# Supplementary material for: Biomass-Derived Carbon Electrodes with Optimized Defects and Porosity via Regulated Carbonization Temperature for Supercapacitors
Source: Research Square preprint supplement (doi:10.21203/rs.3.rs-8826492/v1), 2026-02-20
Supplement: Supplementary file 1 [file 4ec92741cc3ba098e8446acf.docx]

Biomass-Derived Carbon Electrodes with Optimized Defects and Porosity *via* Regulated Carbonization Temperature for Supercapacitors

*Tserenlkham Byambadorj a,b, Jiawei Zhang a,*, Xuzhen Lu a, Yuehui Wang a, Fan Wang a, Qian Liu a, Yu Li a,*, Minghua Chen a,*

**a** *Key Laboratory of Engineering Dielectric and Applications (Ministry of Education), School of Electrical and Electronic Engineering, Harbin University of Science and Technology, Harbin 150080, P. R. China*

**b** *School of Power Engineering, Mongolian University of Science and Technology, Ulaanbaatar 14191, Mongolia*

*
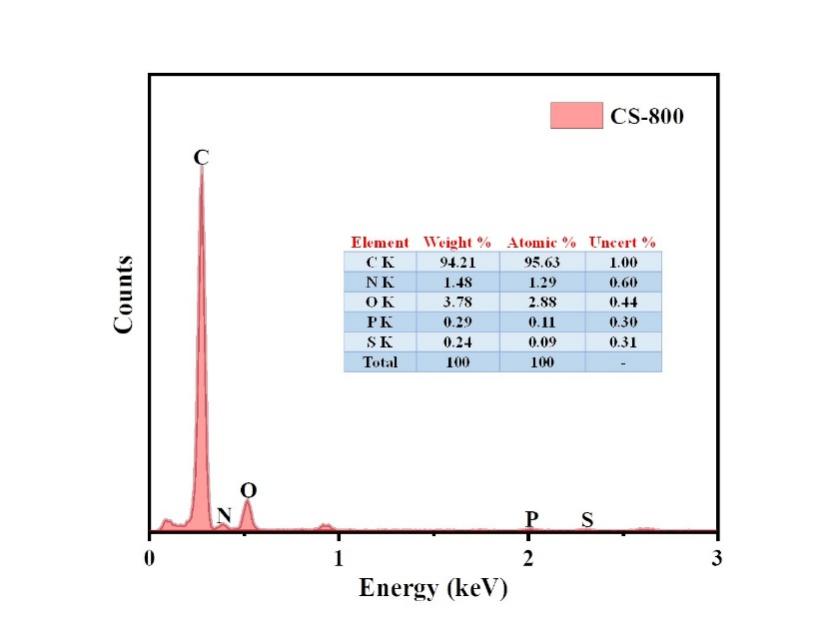
*

**Figure S1.** Elements distribution image of the CS-800 sample.


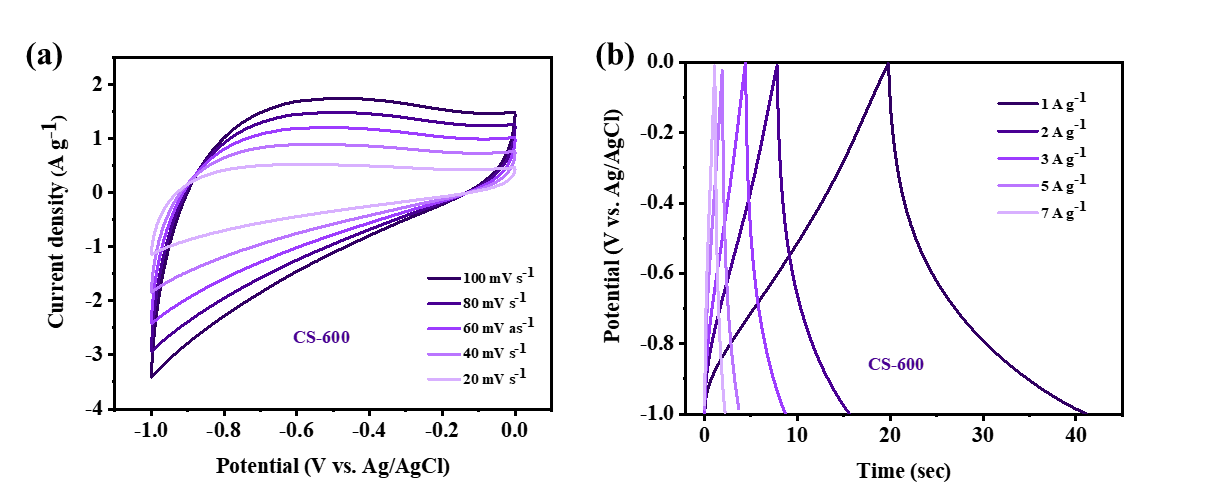


**Figure S2. Electrochemical performance of the CS-600 electrode in a three-electrode configuration:** (a) CV curves at various scan rates and (b) GCD curves at different current densities.


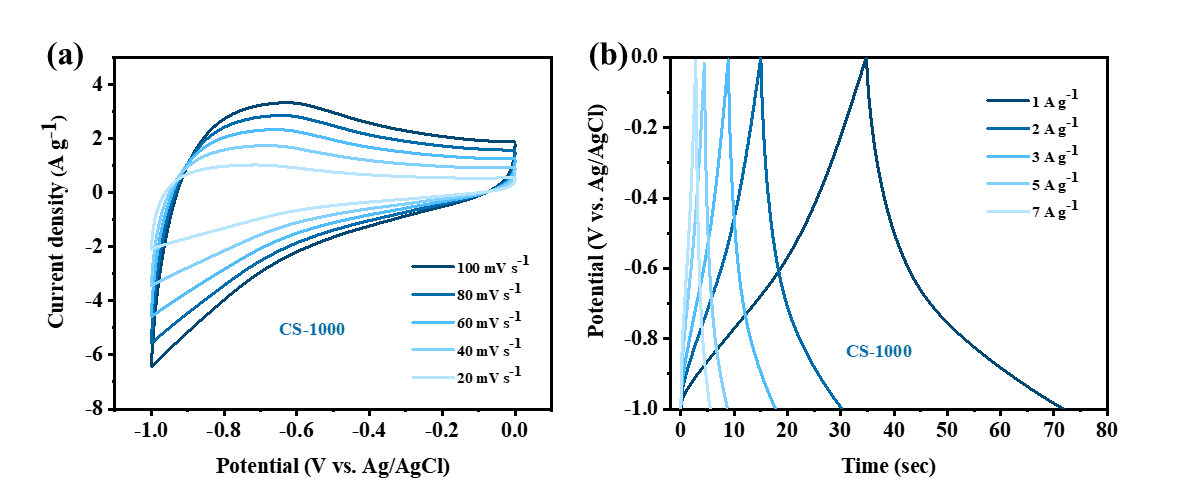


**Figure S3. Electrochemical performance of the CS-1000 electrode in the three-electrode configuration:** (a) CV curves at various scan rates and (b) GCD curves at different current densities.


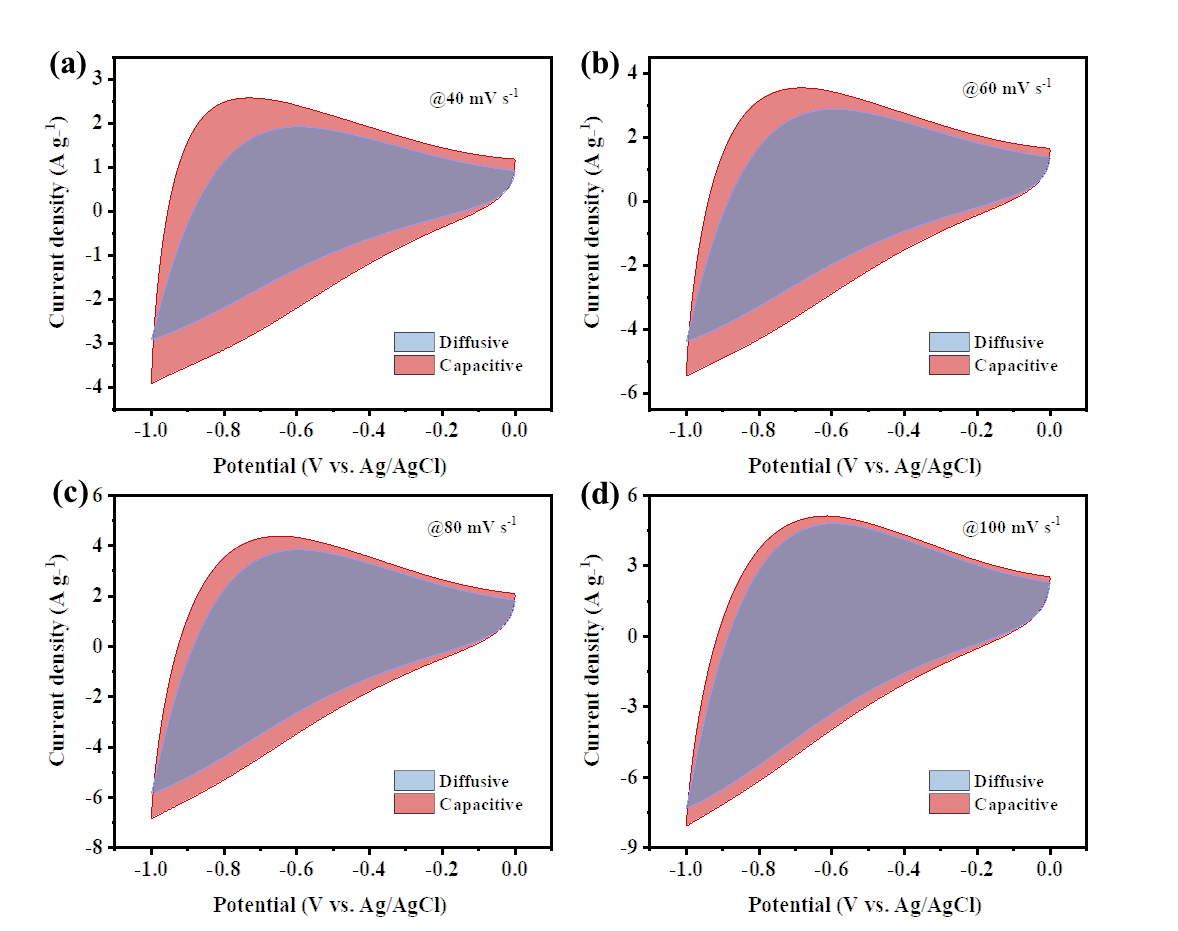


**Figure S4.** Deconvoluted voltammograms illustrating capacitive and diffusive regions scanned at 40 (a), 60 (b), 80 (c), and 100 mV s-1 (d).
